# Supplementary material
Source: MDPI journal article supplement (https://www.mdpi.com/2073-4395/12/4/962)
Supplement: s1 [file s1]

## Supplementary Tables

**Table S1** Distribution of material subgroups and maturity group of World Soybean Germplasm Population (WSGP)

| Sub-population<br>n | MG-set |     |    | Total |
|---------------------|--------|-----|----|-------|
|                     | E      | P   | L  |       |
| A                   | 24     | 51  |    | 75    |
| B                   | 2      | 49  |    | 51    |
| C                   |        | 24  | 22 | 46    |
| D                   | 5      | 107 | 5  | 117   |
| O                   |        | 62  | 3  | 65    |
| WSGP                | 31     | 293 | 30 | 354   |

Note: “O” represents the center of origin; “A” represents Northeast China (NCHN), Far-East of Russia (RUF) and southern Sweden (SSWE); “B” represents the Korea Peninsular (KORP) and Japan Islands (JPAN); “C” represents Southeast Asia (SEAS), South Asia (SASI) and Africa (AFRI); “D” represents northern North America (NNAM), southern North America (SNAM) and Central and South America (CSAM); “E” represents the early MG-set (MG 000~0); “P” represents the primary MG-set (MG I~VII), “L” represents the late MG-set (MG VIII~X).

**Table S2** Source information of the tested varieties in the World Soybean Germplasm Population (WSGP)

| Variety code | Country source | Geo-pop. | MG-set | Variety code | Country source | Geo-pop. | MG-set |
|--------------|----------------|----------|--------|--------------|----------------|----------|--------|
| N24136.000   | China          | A        | P      | N25306       | China          | A        | P      |
| N24571.000   | Russia         | A        | P      | N27107       | Sweden         | A        | E      |
| N24782.000   | South Korea    | B        | P      | N23816.000   | Japan          | B        | P      |
| N27113       | America        | D        | P      | N24813.000   | South Korea    | B        | P      |
| N27114       | America        | D        | P      | N27108       | Brazil         | D        | P      |
| N23729.000   | China          | A        | P      | N24788.000   | Indonesia      | C        | L      |
| N27282       | America        | D        | P      | N27109       | America        | D        | P      |
| N27116       | America        | D        | P      | N23823.000   | Japan          | B        | P      |
| N24586.000   | Russia         | A        | P      | N27110       | Sweden         | A        | E      |
| N27258       | America        | D        | P      | N27111       | America        | D        | P      |
| N27118       | America        | D        | P      | N24767.000   | Russia         | A        | P      |
| N27294       | Sweden         | A        | E      | N23825.000   | Japan          | B        | P      |
| N25318       | China          | A        | P      | N24764.000   | Nepal          | C        | L      |
| N27279       | America        | D        | P      | N23824.000   | Japan          | B        | P      |
| N27274       | America        | D        | P      | N24793.000   | Nepal          | C        | P      |
| N27273       | America        | D        | P      | N24807.000   | Indonesia      | C        | P      |
| N24775.000   | Thailand       | C        | L      | N23822.000   | Japan          | B        | P      |
| N24759.000   | Russia         | A        | P      | N23819.000   | Japan          | B        | P      |
| N27265       | America        | D        | P      | N01225.000   | America        | D        | P      |
| N27275       | America        | D        | P      | N24584.000   | Russia         | A        | P      |
| N27263       | America        | D        | P      | N27115       | America        | D        | P      |
| N27262       | America        | D        | P      | N24791.000   | Thailand       | C        | L      |
| N27296       | Sweden         | A        | E      | N27117       | Sweden         | A        | E      |
| N27266       | America        | D        | P      | N27119       | America        | D        | P      |
| N27152       | Sweden         | A        | E      | N24787.000   | Myanmar        | C        | P      |
| N01228.000   | China          | O        | P      | N24698.000   | South Korea    | B        | P      |
| N24878.000   | Japan          | B        | P      | N24686.000   | Russia         | A        | P      |
| N27280       | America        | D        | L      | N24768.000   | Russia         | A        | P      |
| N24808.000   | Pakistan       | C        | L      | N06653.000   | Mexico         | D        | P      |
| N23820.000   | Japan          | B        | P      | N24876.000   | America        | D        | P      |
| N25109       | America        | D        | P      | N27121       | America        | D        | P      |
| N27281       | America        | D        | E      | N24728.000   | Russia         | A        | P      |
| N27277       | America        | D        | P      | N27090       | Brazil         | D        | P      |
| N27284       | America        | D        | P      | N24785.000   | South Korea    | B        | P      |
| N24797.000   | Myanmar        | C        | P      | N27122       | Brazil         | D        | P      |
| N01261.000   | South Korea    | B        | P      | N27123       | America        | D        | P      |
| N27285       | America        | D        | P      | N27091       | America        | D        | P      |
| N24817.000   | Vietnam        | C        | P      | N24771.000   | Thailand       | C        | L      |
| N27264       | America        | D        | P      | N24862.000   | America        | D        | P      |
| N27176       | America        | D        | P      | N23813.000   | Japan          | B        | P      |
| N27298       | China          | A        | E      | N27125       | America        | D        | P      |
| N27299       | China          | A        | E      | N27126       | Brazil         | D        | P      |
| N27300       | China          | A        | E      | N27127       | Brazil         | D        | P      |
| N27301       | China          | A        | E      | N27128       | Japan          | B        | P      |
| N27303       | China          | A        | E      | N24585.000   | Russia         | A        | P      |
| N27304       | China          | A        | E      | N24802.000   | Thailand       | C        | L      |
| N27305       | China          | A        | E      | N27129       | Brazil         | D        | P      |
| N27270       | America        | D        | P      | N27092       | America        | D        | P      |
| N27101       | Japan          | B        | P      | N24865.000   | Japan          | B        | P      |
| N27276       | America        | D        | P      | N27130       | America        | D        | P      |
| N27286       | America        | D        | P      | N27132       | Brazil         | D        | P      |
| N27373       | China          | O        | P      | N27133       | America        | D        | P      |
| N27374       | China          | O        | P      | N27134       | Japan          | B        | P      |
| N07682.100   | China          | A        | E      | N24776.000   | Philippine     | C        | L      |
| N24695.000   | Russia         | A        | P      | N07357.000   | Sri Lanka      | C        | P      |
| N27259       | America        | D        | P      | N24710.000   | Russia         | A        | P      |
| N27278       | America        | D        | P      | N07360.000   | Sri Lanka      | C        | P      |
| N27260       | America        | D        | E      | N27135       | Sweden         | A        | E      |
| N25168       | China          | O        | P      | N24786.000   | South Korea    | B        | P      |

|             |             |   |   |            |              |   |   |
|-------------|-------------|---|---|------------|--------------|---|---|
| N27414      | China       | O | L | N27136     | Sweden       | A | E |
| N27415      | China       | O | P | N23827.000 | Japan        | B | P |
| N27418      | China       | O | L | N27137     | Brazil       | D | P |
| N27245      | Canada      | D | E | N27093     | Sweden       | A | E |
| N27256      | Canada      | D | E | N27138     | Brazil       | D | P |
| N24818.000  | North Korea | B | P | N24805.000 | Indonesia    | C | P |
| N27272      | America     | D | P | N06589.000 | Vietnam      | C | P |
| N27247      | Canada      | D | P | N27139     | America      | D | P |
| N27288      | America     | D | P | N27140     | America      | D | P |
| N27253      | America     | D | P | N27141     | America      | D | P |
| N27255      | Canada      | D | E | N24859.000 | America      | D | P |
| N27242      | America     | D | P | N24815.000 | Vietnam      | C | P |
| N27267      | America     | D | P | N24563.000 | North Korea  | B | P |
| N27246      | America     | D | P | N24784.000 | South Korea  | B | P |
| N27243      | America     | D | P | N01343.000 | Japan        | B | P |
| N27254      | America     | D | P | N27143     | Sweden       | A | E |
| N27257      | America     | D | P | N23821.000 | Japan        | B | P |
| N27292      | America     | D | P | N07359.000 | Sri Lanka    | C | L |
| N27252      | America     | D | P | N24779.000 | Nepal        | C | L |
| N27293      | America     | D | P | N27144     | America      | D | L |
| N27261      | America     | D | P | N24871.000 | Mozambique   | C | L |
| N27290      | America     | D | P | N24781.000 | Zaire        | C | L |
| N27241      | America     | D | P | N23992.000 | Japan        | B | P |
| N27289      | America     | D | P | N24798.000 | Philippine   | C | L |
| N27251      | America     | D | P | N27145     | America      | D | P |
| N27240      | South Korea | B | P | N08661.100 | Myanmar      | C | P |
| N27271      | America     | D | P | N23826.000 | Japan        | B | P |
| N25220      | China       | A | P | N27094     | Brazil       | D | P |
| N27283      | America     | D | P | N27147     | Brazil       | D | P |
| N08855.000  | China       | O | P | N22996.000 | South Africa | C | P |
| N000611.110 | China       | O | P | N27148     | Japan        | B | P |
| N23682.000  | China       | O | P | N27149     | America      | D | P |
| N03343.000  | China       | O | P | N24872.000 | Japan        | B | E |
| N25430      | China       | O | P | N24774.000 | Thailand     | C | L |
| N25363      | China       | O | P | N24795.000 | Malaysia     | C | L |
| N25130      | China       | O | P | N24772.000 | Nepal        | C | L |
| N25147      | China       | O | P | N27150     | America      | D | P |
| N25299      | China       | O | P | N27151     | Brazil       | D | P |
| N05126.000  | China       | O | P | N24573.000 | Russia       | A | P |
| N22492.000  | China       | O | P | N27088     | America      | D | P |
| N02229.000  | China       | O | P | N24819.000 | India        | C | P |
| N21295.000  | China       | O | P | N24866.000 | Tanzania     | C | L |
| N25499      | China       | O | P | N01244.000 | America      | D | L |
| N25267      | China       | O | P | N27153     | America      | D | P |
| N25287      | China       | O | P | N27154     | Brazil       | D | P |
| N23748.000  | China       | O | P | N06620.000 | Vietnam      | C | P |
| N23563      | China       | O | P | N27156     | Brazil       | D | P |
| N05458.000  | China       | O | P | N27157     | Brazil       | D | P |
| N23569.000  | China       | O | P | N23814.000 | Japan        | B | P |
| N23617      | China       | O | P | N24696.000 | Russia       | A | P |
| N25134      | China       | O | P | N23912.000 | Japan        | B | P |
| N25293      | China       | O | P | N24572.000 | Russia       | A | E |
| N04930.100  | China       | O | P | N27158     | Brazil       | D | P |
| N25158      | China       | O | P | N24706.000 | South Korea  | B | E |
| N00013.100  | China       | O | P | N27159     | America      | D | P |
| N25225      | China       | O | P | N27097     | America      | D | P |
| N25169      | China       | O | P | N24810.000 | Malaysia     | C | L |
| N25135      | China       | O | P | N24792.000 | Thailand     | C | L |
| N04978.000  | China       | O | P | N27098     | America      | D | P |
| N25274      | China       | O | P | N27160     | Japan        | B | P |
| N09955.000  | China       | O | P | N27163     | Japan        | B | P |
| N25461      | China       | O | P | N24726.000 | Russia       | A | P |
| N23970.000  | China       | O | P | N24875.000 | America      | D | P |
| N09120.000  | China       | O | P | N27164     | Sweden       | A | E |

|             |       |   |   |            |             |   |   |
|-------------|-------|---|---|------------|-------------|---|---|
| N01599.100  | China | O | P | N27165     | Brazil      | D | P |
| N23568.000  | China | O | P | N27166     | America     | D | P |
| N02951.100  | China | O | L | N24868.000 | Indonesia   | C | P |
| N21478.000  | China | O | P | N27167     | Sweden      | A | P |
| N07384.000  | China | O | P | N27168     | Brazil      | D | P |
| N21266.000  | China | O | P | N01316.000 | Japan       | B | P |
| N05461.000  | China | O | P | N06603.000 | Nigeria     | C | P |
| N00667.000  | China | O | P | N27169     | America     | D | P |
| N22503.000  | China | O | P | N24770.000 | Zaire       | C | L |
| N09117.000  | China | O | P | N27170     | America     | D | P |
| N22308.000  | China | O | P | N27171     | America     | D | P |
| N25339      | China | O | P | N24732.000 | Russia      | A | P |
| N25404      | China | O | P | N24867.000 | Venezuela   | D | L |
| N23688.000  | China | O | P | N24803.000 | Pakistan    | C | P |
| N25226      | China | O | P | N27172     | America     | D | P |
| N06144.000  | China | O | P | N24719.000 | Russia      | A | P |
| N25511      | China | O | P | N24814.000 | Vietnam     | C | P |
| N07917.000  | China | O | P | N24763.000 | South Korea | B | P |
| N070381.100 | China | O | P | N23812.000 | Japan       | B | P |
| N25489      | China | O | P | N27099     | America     | D | P |
| N25353      | China | O | P | N27173     | Japan       | B | P |
| N23774.000  | China | O | P | N27174     | America     | D | P |
| N25281      | China | O | P | N27175     | Sweden      | A | E |
| N24391      | China | A | E | N27177     | America     | D | P |
| N24392.000  | China | A | P | N27178     | Brazil      | D | P |
| N24385.000  | China | A | P | N27100     | Japan       | B | P |
| N24406.000  | China | A | P | N23818.000 | Japan       | B | P |
| N25178      | China | A | E | N24812.000 | Myanmar     | C | P |
| N25186      | China | A | E | N24816.000 | South Korea | B | P |
| N25206      | China | A | P | N24883.000 | America     | D | P |
| N25200      | China | A | P | N27102     | Brazil      | D | P |
| N25223      | China | A | P | N06575.000 | Nigeria     | C | P |
| N25251      | China | A | P | N24864.000 | Brazil      | D | L |
| N25262      | China | A | P | N27103     | Brazil      | D | P |
| N25417      | China | A | P | N27104     | Brazil      | D | P |
| N25421      | China | A | P | N24780.000 | South Korea | B | P |
| N25255      | China | A | P | N23955.000 | Japan       | B | P |
| N25369      | China | A | P | N24806.000 | Philippine  | C | L |
| N08814.000  | China | A | P | N24801.000 | India       | C | P |
| N01133.000  | China | A | P | N24576.000 | Russia      | A | P |
| N01102.000  | China | A | P | N01216.000 | Japan       | B | P |
| N24418.000  | China | A | P | N24773.000 | Thailand    | C | P |
| N24419.000  | China | A | P | N23817.000 | Japan       | B | P |
| N25309      | China | A | P | N24799.000 | India       | C | P |
| N25312      | China | A | P | N24769.000 | Philippine  | C | L |
| N25314      | China | A | P | N27105     | America     | D | P |
| N25315      | China | A | P | N01242.000 | America     | D | P |
| N25319      | China | A | P | N24565.000 | North Korea | B | P |
| N25320      | China | A | P | N24748.000 | South Korea | B | P |
| N25321      | China | A | P | N24863.000 | America     | D | P |
| N25302      | China | A | P | N01207.000 | Japan       | B | P |
| N25303      | China | A | P | N24796.000 | Nepal       | C | P |
| N25304      | China | A | P | N24874.000 | South Korea | B | P |
| N25305      | China | A | P | N24783.000 | South Korea | B | P |

Note: Geo-pop.: Geographic groups; MG-set: maturity group set. “O” represents the center of origin; “A” represents Northeast China (NCHN), Far-East of Russia (RUFE) and southern Sweden (SSWE); “B” represents the Korea Peninsular (KORP) and Japan Islands (JPAN); “C” represents Southeast Asia (SEAS), South Asia (SASI) and Africa (AFRI); “D” represents northern North America (NNAM), southern North America (SNAM) and Central and South America (CSAM). “E” represents the early MG-set (MG 000~0); “P” represents the primary MG-set (MG I ~ VII), “L” represents the late MG-set (MG VIII~X).

**Table S3** Analysis of variance of growth period traits, accumulative day length and accumulative active temperature in the World Soybean Germplasm Population (WSGP)

| SV       | DSF  |             |          |                    | ADL <sub>DSF</sub> |          |          |                    | AAT <sub>DSF</sub> |          |          |                    |
|----------|------|-------------|----------|--------------------|--------------------|----------|----------|--------------------|--------------------|----------|----------|--------------------|
|          | DF   | MS          | F-value  | h <sup>2</sup> (%) | DF                 | MS       | F-value  | h <sup>2</sup> (%) | DF                 | MS       | F-value  | h <sup>2</sup> (%) |
| Env      | 3    | 50025.6331  | 552.91** |                    | 3                  | 10211424 | 509.91** |                    | 3                  | 5896359  | 118.41** |                    |
| Blk(env) | 7    | 10.3732     | 3.7**    |                    | 7                  | 1694.47  | 3.32**   |                    | 7                  | 7736.84  | 3.60**   |                    |
| Geno     | 352  | 2784.744    | 34.25**  | 95.7               | 352                | 575815   | 31.18**  | 95.8               | 352                | 2193250  | 50.66**  | 99.2               |
| Geno×Env | 1049 | 83.1646     | 29.63**  | 4.2                | 1049               | 18897    | 37.06**  | 4.1                | 1053               | 44218    | 20.57**  | 0.7                |
| Error    | 2445 | 2.806       |          |                    | 2445               | 509.8    |          |                    | 2458               | 2149.8   |          |                    |
| Total    | 3856 |             |          |                    | 3856               |          |          |                    | 3873               |          |          |                    |
| SV       | DFM  |             |          |                    | ADL <sub>DFM</sub> |          |          |                    | AAT <sub>DFM</sub> |          |          |                    |
|          | DF   | MS          | F-value  | h <sup>2</sup> (%) | DF                 | MS       | F-value  | h <sup>2</sup> (%) | DF                 | MS       | F-value  | h <sup>2</sup> (%) |
| Env      | 3    | 124848.0241 | 308.38** |                    | 3                  | 31839234 | 428.52** |                    | 3                  | 95422994 | 278.75** |                    |
| Blk(env) | 7    | 46.5576     | 2.95**   |                    | 7                  | 10153    | 3.83**   |                    | 7                  | 28778    | 3.15**   |                    |
| Geno     | 352  | 2673.5605   | 7.27**   | 80.7               | 352                | 383060   | 5.84**   | 78.5               | 352                | 1332370  | 4.21**   | 70.9               |
| Geno×Env | 1044 | 376.6775    | 23.9**   | 18.8               | 1048               | 67289    | 25.37**  | 20.9               | 1048               | 324005   | 35.42**  | 29.0               |
| Error    | 2411 | 15.759      |          |                    | 2413               | 2652.5   |          |                    | 2426               | 9147     |          |                    |
| Total    | 3817 |             |          |                    | 3823               |          |          |                    | 3836               |          |          |                    |

Note: SV: Source of variation; DSF: days from sowing to flowering; ADL<sub>DSF</sub>: DSF required accumulative day length; AAT<sub>DSF</sub>: DSF required accumulative active temperature; DFM: days from flowering to maturity; ADL<sub>DFM</sub>: DFM required accumulative day length; AAT<sub>DFM</sub>: DFM required accumulative active temperature; DF: degree of freedom; MS: mean square; h<sup>2</sup>: heritability value calculated from the ANOVA; \*\*indicate significance level at  $\alpha=0.01$  in *F*-test.

**Table S4** Regression analysis of variance of growth period traits, accumulative day length and accumulative active temperature

| SV                                               | Geographic subpopulation / MG-set subpopulation |         |         |         |     |        |         |         |     |        |         |         |
|--------------------------------------------------|-------------------------------------------------|---------|---------|---------|-----|--------|---------|---------|-----|--------|---------|---------|
|                                                  | Total                                           |         |         |         | O   |        |         |         | A   |        |         |         |
|                                                  | DF                                              | MS      | F-value | P-value | DF  | MS     | F-value | P-value | DF  | MS     | F-value | P-value |
| ADL <sub>DSF</sub> (x <sub>1</sub> )             | 1                                               | 13.37   | 87.90   | <0.0001 | 1   | 1.43   | 40.18   | <0.0001 | 1   | 3.55   | 60.88   | <0.0001 |
| AAT <sub>DSF</sub> (x <sub>2</sub> )             | 1                                               | 15.74   | 103.49  | <0.0001 | 1   | 0.75   | 21.07   | <0.0001 | 1   | 1.24   | 21.32   | <0.0001 |
| (x <sub>1</sub> ×x <sub>2</sub> ) <sub>DSF</sub> | 1                                               | 6.01    | 39.51   | <0.0001 | 1   | 2.69   | 75.68   | <0.0001 | 1   | 0.45   | 7.71    | 0.0070  |
| Error                                            | 349                                             | 0.15    |         |         | 61  | 0.04   |         |         | 71  | 0.06   |         |         |
| Total                                            | 352                                             |         |         |         | 64  |        |         |         | 74  |        |         |         |
| B                                                |                                                 |         |         | C       |     |        |         | D       |     |        |         |         |
| ADL <sub>DSF</sub> (x <sub>1</sub> )             | 1                                               | 1.99    | 30.79   | <0.0001 | 1   | 0.05   | 0.08    | 0.7739  | 1   | 2.45   | 33.9    | <0.0001 |
| AAT <sub>DSF</sub> (x <sub>2</sub> )             | 1                                               | 0.01    | 0.08    | 0.7745  | 1   | 9.03   | 15.06   | 0.0004  | 1   | 1.09   | 15.12   | 0.0002  |
| (x <sub>1</sub> ×x <sub>2</sub> ) <sub>DSF</sub> | 1                                               | 0.35    | 5.41    | 0.0244  | 1   | 0.15   | 0.26    | 0.6153  | 1   | 1.94   | 26.85   | <0.0001 |
| Error                                            | 47                                              | 0.06    |         |         | 41  | 0.60   |         |         | 113 | 0.07   |         |         |
| Total                                            | 50                                              |         |         |         | 44  |        |         |         | 116 |        |         |         |
| E                                                |                                                 |         |         | P       |     |        |         | L       |     |        |         |         |
| ADL <sub>DSF</sub> (x <sub>1</sub> )             | 1                                               | 0.30    | 6.75    | 0.015   | 1   | 7.04   | 56.62   | <0.0001 | 1   | 0.07   | 0.12    | 0.7309  |
| AAT <sub>DSF</sub> (x <sub>2</sub> )             | 1                                               | 0.12    | 2.59    | 0.1194  | 1   | 10.27  | 82.56   | <0.0001 | 1   | 3.90   | 7.18    | 0.0126  |
| (x <sub>1</sub> ×x <sub>2</sub> ) <sub>DSF</sub> | 1                                               | 3.9E-05 | 0.00    | 0.9768  | 1   | 1.58   | 12.72   | 0.0004  | 1   | 0.62   | 1.14    | 0.2951  |
| Error                                            | 27                                              | 0.05    |         |         | 288 | 0.12   |         |         | 26  | 0.54   |         |         |
| Total                                            | 30                                              |         |         |         | 291 |        |         |         | 29  |        |         |         |
| Total                                            |                                                 |         |         | O       |     |        |         | A       |     |        |         |         |
| ADL <sub>DFM</sub> (x <sub>3</sub> )             | 1                                               | 1855.94 | 909.77  | <0.0001 | 1   | 136.15 | 78.62   | <0.0001 | 1   | 0.21   | 0.12    | 0.7263  |
| AAT <sub>DFM</sub> (x <sub>4</sub> )             | 1                                               | 243.63  | 119.42  | <0.0001 | 1   | 14.69  | 8.48    | 0.005   | 1   | 4.66   | 2.72    | 0.1038  |
| (x <sub>3</sub> ×x <sub>4</sub> ) <sub>DFM</sub> | 1                                               | 11.59   | 5.68    | 0.0177  | 1   | 0.80   | 0.46    | 0.5002  | 1   | 8.44   | 4.91    | 0.0298  |
| Error                                            | 349                                             | 2.04    |         |         | 61  | 1.73   |         |         | 71  | 1.72   |         |         |
| Total                                            | 352                                             |         |         |         | 64  |        |         |         | 74  |        |         |         |
| B                                                |                                                 |         |         | C       |     |        |         | D       |     |        |         |         |
| ADL <sub>DFM</sub> (x <sub>3</sub> )             | 1                                               | 81.59   | 53.34   | <0.0001 | 1   | 100.85 | 92.09   | <0.0001 | 1   | 272.27 | 350.34  | <0.0001 |
| AAT <sub>DFM</sub> (x <sub>4</sub> )             | 1                                               | 31.14   | 20.36   | <0.0001 | 1   | 4.60   | 4.2     | 0.0468  | 1   | 53.78  | 69.2    | <0.0001 |
| (x <sub>3</sub> ×x <sub>4</sub> ) <sub>DFM</sub> | 1                                               | 0.08    | 0.05    | 0.8223  | 1   | 1.16   | 1.06    | 0.3092  | 1   | 3.20   | 4.12    | 0.0448  |
| Error                                            | 47                                              | 1.53    |         |         | 41  | 1.10   |         |         | 113 | 0.78   |         |         |
| Total                                            | 50                                              |         |         |         | 44  |        |         |         | 116 |        |         |         |
| E                                                |                                                 |         |         | P       |     |        |         | L       |     |        |         |         |
| ADL <sub>DFM</sub> (x <sub>3</sub> )             | 1                                               | 0.11    | 0.06    | 0.8143  | 1   | 780.92 | 397.31  | <0.0001 | 1   | 37.42  | 43.69   | <0.0001 |
| AAT <sub>DFM</sub> (x <sub>4</sub> )             | 1                                               | 1.68    | 0.87    | 0.3593  | 1   | 197.08 | 100.27  | <0.0001 | 1   | 1.90   | 2.21    | 0.1488  |
| (x <sub>3</sub> ×x <sub>4</sub> ) <sub>DFM</sub> | 1                                               | 2.03    | 1.05    | 0.3143  | 1   | 2.91   | 1.48    | 0.2251  | 1   | 0.18   | 0.21    | 0.6468  |
| Error                                            | 27                                              | 1.93    |         |         | 288 | 1.97   |         |         | 26  | 0.86   |         |         |
| Total                                            | 30                                              |         |         |         | 291 |        |         |         | 29  |        |         |         |

Note: SV: Source of variation; ADL<sub>DSF</sub>: DSF required accumulative day length; AAT<sub>DSF</sub>: DSF required accumulative active temperature; DFM: days from flowering to maturity; ADL<sub>DFM</sub>: DFM required accumulative day length; AAT<sub>DFM</sub>: DFM required accumulative active temperature; (x<sub>1</sub>×x<sub>2</sub>)<sub>DSF</sub> represents the interaction between ADL and AAT for DSF; (x<sub>3</sub>×x<sub>4</sub>)<sub>DFM</sub> represents the interaction between ADL and AAT for DFM. DF: degree of freedom; MS: mean square.

“O” represents the center of origin; “A” represents Northeast China (NCHN), Far-East of Russia (RUFE) and southern Sweden (SSWE); “B” represents the Korea Peninsular (KORP) and Japan Islands (JPAN); “C” represents Southeast Asia (SEAS), South Asia (SASI) and Africa (AFRI); “D” represents northern North America (NNAM), southern North America (SNAM) and Central and South America (CSAM); “E” represents the early MG-set (MG 000~0); “P” represents the primary MG-set (MG I~VII), “L” represents the late MG-set (MG VIII~X).

**Table S5** Estimation of parameters in regression of growth period traits on accumulative day length and accumulative active temperature

| Variable                                         | Geographic subpopulation / MG-set subpopulation |                |          |                    |                |          |                    |                |         |
|--------------------------------------------------|-------------------------------------------------|----------------|----------|--------------------|----------------|----------|--------------------|----------------|---------|
|                                                  | Total                                           |                |          | O                  |                |          | A                  |                |         |
|                                                  | Parameter estimate                              | Standard error | t-value  | Parameter estimate | Standard error | t-value  | Parameter estimate | Standard error | t-value |
| Intercept                                        | -0.7755                                         | 0.2016         | -3.85    | 1.9149             | 0.5032         | 3.81     | 2.4344             | 1.2132         | 2.01    |
| ADL <sub>DSF</sub> (X <sub>1</sub> )             | 0.0298                                          | 0.0032         | 9.38**   | 0.0309             | 0.0049         | 6.34**   | 0.0318             | 0.0041         | 7.8**   |
| AAT <sub>DSF</sub> (X <sub>2</sub> )             | 0.0178                                          | 0.0018         | 10.17**  | 0.013              | 0.0028         | 4.59**   | 0.0096             | 0.0021         | 4.62**  |
| (X <sub>1</sub> ×X <sub>2</sub> ) <sub>DSF</sub> | 1.1E-06                                         | 1.8E-07        | 6.29**   | 4.4E-06            | 5.1E-07        | 8.7**    | 9.3E-06            | 3.3E-06        | 2.78**  |
|                                                  | B                                               |                |          | C                  |                |          | D                  |                |         |
| Intercept                                        | 0.5861                                          | 0.6772         | 0.87     | -0.9358            | 2.7861         | -0.34    | -0.6872            | 0.3497         | -1.97   |
| ADL <sub>DSF</sub> (X <sub>1</sub> )             | 0.0589                                          | 0.0106         | 5.55**   | -0.0042            | 0.0146         | -0.29    | 0.0372             | 0.0064         | 5.82**  |
| AAT <sub>DSF</sub> (X <sub>2</sub> )             | 0.0016                                          | 0.0055         | 0.29     | 0.0353             | 0.0091         | 3.88**   | 0.0138             | 0.0035         | 3.89**  |
| (X <sub>1</sub> ×X <sub>2</sub> ) <sub>DSF</sub> | 2.0E-06                                         | 8.4E-07        | 2.33*    | 8.3E-07            | 1.6E-06        | 0.51     | 1.6E-06            | 3.1E-07        | 5.18**  |
|                                                  | E                                               |                |          | P                  |                |          | L                  |                |         |
| Intercept                                        | -1.0249                                         | 5.8403         | -0.18    | -1.0179            | 0.2546         | -4       | 2.3646             | 4.6630         | 0.51    |
| ADL <sub>DSF</sub> (X <sub>1</sub> )             | 0.0411                                          | 0.0158         | 2.6*     | 0.0287             | 0.00386        | 7.52**   | 0.0065             | 0.0186         | 0.35    |
| AAT <sub>DSF</sub> (X <sub>2</sub> )             | 0.0134                                          | 0.0083         | 1.61     | 0.01877            | 0.0021         | 9.09**   | 0.0268             | 0.0101         | 2.68*   |
| (X <sub>1</sub> ×X <sub>2</sub> ) <sub>DSF</sub> | -6.3E-07                                        | 2.2E-05        | -0.03    | 9.5E-07            | 2.7E-07        | 3.57**   | 2.3E-06            | 2.1E-06        | 1.07    |
|                                                  | Total                                           |                |          | O                  |                |          | A                  |                |         |
| Intercept                                        | -18.7483                                        | 4.6149         | -4.06    | -15.0090           | 14.0627        | -1.07    | 11.4159            | 12.9932        | 0.88    |
| ADL <sub>DFM</sub> (X <sub>3</sub> )             | 0.1477                                          | 0.0049         | 30.16**  | 0.1338             | 0.0151         | 8.87**   | -0.0099            | 0.0283         | -0.35   |
| AAT <sub>DFM</sub> (X <sub>4</sub> )             | -0.0261                                         | 0.0024         | -10.93** | -0.0209            | 0.0072         | -2.91*   | 0.0195             | 0.0118         | 1.65    |
| (X <sub>3</sub> ×X <sub>4</sub> ) <sub>DFM</sub> | -4.7E-06                                        | 2.0E-06        | -2.38*   | -4.0E-06           | 5.9E-06        | -0.68    | 1.5E-05            | 6.6E-06        | 2.22*   |
|                                                  | B                                               |                |          | C                  |                |          | D                  |                |         |
| Intercept                                        | -6.5911                                         | 8.7876         | -0.75    | -16.8950           | 13.3524        | -1.27    | -23.1280           | 6.9785         | -3.31   |
| ADL <sub>DFM</sub> (X <sub>3</sub> )             | 0.1250                                          | 0.0171         | 7.3**    | 0.1264             | 0.0132         | 9.6**    | 0.1530             | 0.0082         | 18.72** |
| AAT <sub>DFM</sub> (X <sub>4</sub> )             | -0.0240                                         | 0.0053         | -4.51**  | -0.0138            | 0.0067         | -2.05*   | -0.0257            | 0.0031         | -8.32** |
| (X <sub>3</sub> ×X <sub>4</sub> ) <sub>DFM</sub> | -9.7E-07                                        | 4.3E-06        | -0.23    | -5.6E-06           | 5.4E-06        | -1.03    | -5.9E-06           | 2.9E-06        | -2.03*  |
|                                                  | E                                               |                |          | P                  |                |          | L                  |                |         |
| Intercept                                        | 56.5449                                         | 58.0646        | 0.97     | -13.0944           | 5.9102         | -2.22    | -6.3590            | 12.0665        | -0.53   |
| ADL <sub>DFM</sub> (X <sub>3</sub> )             | 0.0166                                          | 0.0699         | 0.24     | 0.1461             | 0.0073         | 19.93**  | 0.1089             | 0.0165         | 6.61*   |
| AAT <sub>DFM</sub> (X <sub>4</sub> )             | -0.0379                                         | 0.0406         | -0.93    | -0.0298            | 0.0030         | -10.01** | -0.0130            | 0.0088         | -1.49   |
| (X <sub>3</sub> ×X <sub>4</sub> ) <sub>DFM</sub> | 3.5E-05                                         | 3.4E-05        | 1.03     | -3.1E-06           | 2.5E-06        | -1.22    | -2.2E-06           | 4.8E-06        | -0.46   |

Note: DSF: days from sowing to flowering; ADL<sub>DSF</sub>: DSF required accumulative day length; AAT<sub>DSF</sub>: DSF required accumulative active temperature; DFM: days from flowering to maturity; ADL<sub>DFM</sub>: DFM required accumulative day length; AAT<sub>DFM</sub>: DFM required accumulative active temperature. “O” represents the center of origin; “A” represents Northeast China (NCHN), Far-East of Russia (RUFE) and southern Sweden (SSWE); “B” represents the Korea Peninsular (KORP) and Japan Islands (JPAN); “C” represents Southeast Asia (SEAS), South Asia (SASI) and Africa (AFRI); “D” represents northern North America (NNAM), southern North America (SNAM) and Central and South America (CSAM); “E” represents the early MG-set (MG 000~0); “P” represents the primary MG-set (MG I~VII), “L” represents the late MG-set (MG VIII~X).

**Table S6** Variation of growth period traits, accumulative day length and accumulative active temperature in genetic clusters of the World Soybean Germplasm Population (WSGP)

| Trait                        | Genetic cluster        | Class midpoint value (frequency) |      |      |      |      |      |      |      |      |      |       |     | N                    | Mean | GCV(%) | Range         |
|------------------------------|------------------------|----------------------------------|------|------|------|------|------|------|------|------|------|-------|-----|----------------------|------|--------|---------------|
| ADL <sub>DSF</sub><br>(d•h)  | (PDL <sub>DSF</sub> %) | <320                             | 370  | 470  | 570  | 670  | 770  | 870  | 970  | 1070 | 1170 | >1220 |     |                      |      |        |               |
| i(29.7 <sup>B</sup> )        |                        | 0                                | 0    | 1    | 0    | 0    | 0    | 0    | 0    | 0    | 0    | 0     | 1   | 448.0 <sup>B</sup>   | /    |        | 448.0-448.0   |
| ii(33.5 <sup>BA</sup> )      |                        | 0                                | 2    | 2    | 1    | 3    | 1    | 0    | 0    | 0    | 1    | 0     | 10  | 611.5 <sup>BA</sup>  | 37.3 |        | 365.0-1138.0  |
| iii(33.1 <sup>BA</sup> )     |                        | 0                                | 0    | 2    | 4    | 1    | 1    | 0    | 0    | 0    | 0    | 0     | 8   | 577.4 <sup>B</sup>   | 19.6 |        | 444.0-814.0   |
| iv(28.5 <sup>B</sup> )       |                        | 0                                | 3    | 3    | 0    | 0    | 0    | 0    | 0    | 0    | 0    | 0     | 6   | 423.0 <sup>B</sup>   | 6.6  |        | 381.0-458.0   |
| v(40.0 <sup>A</sup> )        |                        | 0                                | 1    | 11   | 29   | 17   | 7    | 3    | 8    | 6    | 14   | 8     | 104 | 794.9 <sup>A</sup>   | 35.5 |        | 399.0-1382.0  |
| vi(32.5 <sup>BA</sup> )      |                        | 0                                | 2    | 5    | 6    | 4    | 0    | 0    | 0    | 0    | 0    | 0     | 17  | 535.1 <sup>BA</sup>  | 17.5 |        | 359.0-693.0   |
| vii(32.0 <sup>BA</sup> )     |                        | 3                                | 17   | 14   | 8    | 3    | 4    | 2    | 0    | 0    | 0    | 0     | 51  | 490.7 <sup>B</sup>   | 30.4 |        | 313.0-876.0   |
| viii(31.4 <sup>BA</sup> )    |                        | 2                                | 55   | 37   | 5    | 24   | 27   | 3    | 1    | 2    | 0    | 0     | 156 | 536.0 <sup>BA</sup>  | 33.3 |        | 312.0-1099.0  |
| AAT <sub>DSF</sub><br>(d•°C) | (PAT <sub>DSF</sub> %) | <650                             | 760  | 980  | 1200 | 1420 | 1640 | 1860 | 2080 | 2300 | 2520 | >2630 |     |                      |      |        |               |
| i(30.1 <sup>B</sup> )        |                        | 0                                | 0    | 1    | 0    | 0    | 0    | 0    | 0    | 0    | 0    | 0     | 1   | 888.0 <sup>B</sup>   | /    |        | 888.0-888.0   |
| ii(33.8 <sup>BA</sup> )      |                        | 0                                | 3    | 1    | 3    | 2    | 0    | 0    | 1    | 0    | 0    | 0     | 10  | 1176.2 <sup>BA</sup> | 32.7 |        | 737.0-2000.0  |
| iii(33.3 <sup>BA</sup> )     |                        | 0                                | 1    | 2    | 4    | 0    | 1    | 0    | 0    | 0    | 0    | 0     | 8   | 1125.1 <sup>BA</sup> | 19.0 |        | 869.0-1562.0  |
| iv(28.7 <sup>B</sup> )       |                        | 0                                | 4    | 2    | 0    | 0    | 0    | 0    | 0    | 0    | 0    | 0     | 6   | 832.2 <sup>B</sup>   | 7.4  |        | 725.0-894.0   |
| v(41.1 <sup>A</sup> )        |                        | 0                                | 4    | 15   | 29   | 17   | 3    | 8    | 6    | 14   | 3    | 5     | 104 | 1552.1 <sup>A</sup>  | 35.5 |        | 805.0-2726.0  |
| vi(32.6 <sup>BA</sup> )      |                        | 0                                | 3    | 8    | 4    | 2    | 0    | 0    | 0    | 0    | 0    | 0     | 17  | 1044.6 <sup>BA</sup> | 17.0 |        | 725.0-1347.0  |
| vii(32.4 <sup>BA</sup> )     |                        | 4                                | 19   | 13   | 7    | 6    | 2    | 0    | 0    | 0    | 0    | 0     | 51  | 961.4 <sup>B</sup>   | 29.0 |        | 623.0-1683.0  |
| viii(32.0 <sup>BA</sup> )    |                        | 2                                | 70   | 23   | 12   | 37   | 9    | 1    | 1    | 1    | 0    | 0     | 156 | 1049.8 <sup>BA</sup> | 32.2 |        | 628.0-2203.0  |
| ADL <sub>DFM</sub><br>(d•h)  | (PDL <sub>DFM</sub> %) | <720                             | 760  | 840  | 920  | 1000 | 1080 | 1160 | 1240 | 1320 | 1400 | >1440 |     |                      |      |        |               |
| i(70.3 <sup>BA</sup> )       |                        | 0                                | 0    | 0    | 0    | 0    | 1    | 0    | 0    | 0    | 0    | 0     | 1   | 1062.0 <sup>A</sup>  | /    |        | 1062.0-1062.0 |
| ii(66.5 <sup>BA</sup> )      |                        | 0                                | 0    | 1    | 1    | 1    | 2    | 0    | 0    | 3    | 1    | 1     | 10  | 1173.0 <sup>A</sup>  | 18.6 |        | 834.0-1458.0  |
| iii(66.0 <sup>BA</sup> )     |                        | 0                                | 0    | 2    | 0    | 0    | 0    | 0    | 3    | 3    | 0    | 0     | 8   | 1169.5 <sup>A</sup>  | 16.6 |        | 851.0-1309.0  |
| iv(71.5 <sup>A</sup> )       |                        | 0                                | 0    | 0    | 1    | 2    | 0    | 1    | 2    | 0    | 0    | 0     | 6   | 1070.8 <sup>A</sup>  | 13.8 |        | 880.0-1234.0  |
| v(60.0 <sup>B</sup> )        |                        | 0                                | 0    | 7    | 10   | 8    | 17   | 15   | 24   | 12   | 10   | 1     | 104 | 1152.8 <sup>A</sup>  | 14.4 |        | 834.0-1479.0  |
| vi(67.5 <sup>BA</sup> )      |                        | 0                                | 0    | 1    | 2    | 3    | 5    | 2    | 1    | 2    | 1    | 0     | 17  | 1107.4 <sup>A</sup>  | 14.3 |        | 808.0-1419.0  |
| vii(68.0 <sup>BA</sup> )     |                        | 3                                | 14   | 2    | 0    | 7    | 5    | 4    | 3    | 3    | 8    | 2     | 51  | 1036.9 <sup>A</sup>  | 25.2 |        | 652.0-1476.0  |
| viii(68.6 <sup>BA</sup> )    |                        | 0                                | 12   | 12   | 16   | 13   | 11   | 23   | 18   | 26   | 20   | 5     | 156 | 1138.1 <sup>A</sup>  | 18.3 |        | 731.0-1478.0  |
| AAT <sub>DFM</sub><br>(d•°C) | (PAT <sub>DFM</sub> %) | <1400                            | 1470 | 1610 | 1750 | 1890 | 2030 | 2170 | 2310 | 2450 | 2590 | >2660 |     |                      |      |        |               |
| i(69.9 <sup>A</sup> )        |                        | 0                                | 0    | 0    | 0    | 0    | 1    | 0    | 0    | 0    | 0    | 0     | 1   | 2066.0 <sup>A</sup>  | /    |        | 2066.0-2066.0 |
| ii(66.2 <sup>BA</sup> )      |                        | 0                                | 0    | 1    | 1    | 0    | 2    | 1    | 0    | 1    | 3    | 1     | 10  | 2241.1 <sup>A</sup>  | 16.9 |        | 1612.0-2687.0 |
| iii(66.7 <sup>BA</sup> )     |                        | 0                                | 0    | 1    | 1    | 0    | 0    | 0    | 1    | 4    | 1    | 0     | 8   | 2258.0 <sup>A</sup>  | 15.7 |        | 1667.0-2524.0 |
| iv(71.3 <sup>A</sup> )       |                        | 0                                | 0    | 0    | 1    | 2    | 0    | 1    | 0    | 2    | 0    | 0     | 6   | 2086.0 <sup>A</sup>  | 13.9 |        | 1708.0-2411.0 |
| v(58.9 <sup>B</sup> )        |                        | 0                                | 4    | 8    | 13   | 8    | 10   | 12   | 13   | 17   | 13   | 6     | 104 | 2160.4 <sup>A</sup>  | 16.4 |        | 1437.0-2733.0 |
| vi(67.4 <sup>BA</sup> )      |                        | 0                                | 0    | 1    | 1    | 1    | 4    | 5    | 1    | 2    | 2    | 0     | 17  | 2150.4 <sup>A</sup>  | 13.3 |        | 1547.0-2650.0 |
| vii(67.6 <sup>BA</sup> )     |                        | 5                                | 11   | 2    | 1    | 6    | 4    | 3    | 5    | 3    | 7    | 4     | 51  | 1992.5 <sup>A</sup>  | 24.3 |        | 1252.0-2721.0 |
| viii(68.0 <sup>BA</sup> )    |                        | 0                                | 12   | 10   | 10   | 21   | 8    | 14   | 19   | 34   | 19   | 9     | 156 | 2175.0 <sup>A</sup>  | 17.3 |        | 1419.0-2755.0 |

Note: ADL<sub>DSF</sub>: DSF required accumulative day length; AAT<sub>DSF</sub>: DSF required accumulative active temperature; ADL<sub>DFM</sub>: DFM required accumulated day-length; AAT<sub>DFM</sub>: DFM required accumulative active temperature.

PDL<sub>DSF</sub>: Percentage of accumulated day-length during DSF to that in a life cycle; PAT<sub>DSF</sub>: Percentage of accumulative active temperature during DSF to that in a life cycle; PDL<sub>DFM</sub>: Percentage of accumulative day length during DFM to that in a life cycle; PAT<sub>DFM</sub>: Percentage of accumulative active temperature during DFM to that in a life cycle. *N*: the number of accessions; *GCV*: genotypic coefficient of variation. The superscripts of A and B indicate multiple comparisons.



### Supplementary Figure

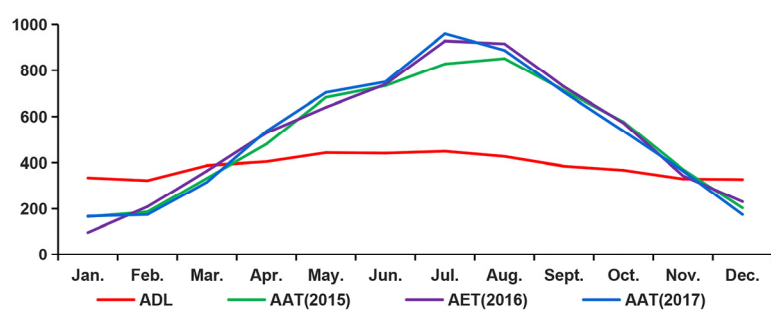

Figure S1 Variation of accumulative day length (ADL) and accumulative active temperature (AAT) among months in experiments site in 2015, 2016 and 2017.

Note: The ADLs were the same among years while the AATs were different among years.
